# Supplementary material
Source: publisher site journal article supplement (https://www.spandidos-publications.com/7022/downloadSupplementary)
Supplement: Supplementary file 1 [file downloadSupplementary]

Table SI. List and the coverage of the 30 candidate genes included in the NGS panel.

| Gene            | Regions | Amplicons | Total bases | Covered bases | Total coverage |
|-----------------|---------|-----------|-------------|---------------|----------------|
| <i>BCHE</i>     | 3       | 13        | 1959        | 1959          | 100.00         |
| <i>DUOX2</i>    | 33      | 45        | 4977        | 4910          | 98.65          |
| <i>EZH2</i>     | 19      | 24        | 2446        | 2446          | 100.00         |
| <i>GLI3</i>     | 14      | 34        | 4883        | 4883          | 100.00         |
| <i>GLIS3</i>    | 10      | 22        | 3293        | 3293          | 100.00         |
| <i>IYD</i>      | 7       | 8         | 1109        | 1109          | 100.00         |
| <i>IGSF1</i>    | 19      | 32        | 4278        | 4278          | 100.00         |
| <i>KAT6B</i>    | 16      | 44        | 6862        | 6852          | 99.85          |
| <i>NEFL</i>     | 5       | 11        | 1882        | 1882          | 100.00         |
| <i>NEFM</i>     | 3       | 17        | 2901        | 2901          | 100.00         |
| <i>NKX2-1</i>   | 3       | 9         | 1356        | 1356          | 100.00         |
| <i>NKX2-5</i>   | 4       | 9         | 1142        | 1142          | 100.00         |
| <i>NSD1</i>     | 22      | 57        | 8311        | 8311          | 100.00         |
| <i>PAX8</i>     | 11      | 14        | 1463        | 1463          | 100.00         |
| <i>PHTF1</i>    | 18      | 27        | 3189        | 3189          | 100.00         |
| <i>POU1F1</i>   | 6       | 9         | 1014        | 1014          | 100.00         |
| <i>SERPINA7</i> | 4       | 10        | 1448        | 1448          | 100.00         |
| <i>SH2B3</i>    | 8       | 17        | 1934        | 1934          | 100.00         |
| <i>SLC26A4</i>  | 20      | 24        | 2543        | 2543          | 100.00         |
| <i>SLC5A5</i>   | 15      | 20        | 2082        | 2082          | 100.00         |
| <i>SECISBP2</i> | 17      | 28        | 3415        | 3415          | 100.00         |
| <i>DUOXA2</i>   | 6       | 10        | 1263        | 1263          | 100.00         |
| <i>TG</i>       | 48      | 71        | 8787        | 8784          | 99.97          |
| <i>FOXE1</i>    | 1       | 7         | 1172        | 1172          | 100.00         |
| <i>LHX4</i>     | 6       | 13        | 1473        | 1473          | 100.00         |
| <i>TPO</i>      | 16      | 24        | 2962        | 2962          | 100.00         |
| <i>TRHR</i>     | 2       | 7         | 1217        | 1217          | 100.00         |
| <i>TSHB</i>     | 2       | 4         | 464         | 464           | 100.00         |
| <i>TSHR</i>     | 11      | 20        | 2538        | 2538          | 100.00         |
| <i>UBR1</i>     | 47      | 57        | 5720        | 5720          | 100.00         |

Table SII. Clinical features and genotypical data in 78 patients with congenital hypothyroidism.

| Patient ID      | Sex    | Age <sup>b</sup> (day) | Screening               | Diagnostic         |              |              |             |             | Thyroid Morphology | Gene             | Nucleotide Change | Amino Acid Change   | Zygosity | Variant Classification |
|-----------------|--------|------------------------|-------------------------|--------------------|--------------|--------------|-------------|-------------|--------------------|------------------|-------------------|---------------------|----------|------------------------|
|                 |        |                        | Heel Blood TSH (μIU/mL) | Serum TSH (μIU/mL) | FT4 (pmol/L) | FT3 (pmol/L) | T4 (nmol/L) | T3 (nmol/L) |                    |                  |                   |                     |          |                        |
| 1               | Male   | 9                      | 82.31                   | >100               | 2.44         | 2.22         | 17.2        | 1.09        | Normal             | <i>DUOX2</i>     | c.3329G>A         | p.Arg1110Gln        | Het      | P                      |
|                 |        |                        |                         |                    |              |              |             |             |                    | <i>DUOX2</i>     | c.3616G>A         | p.Ala1206Thr        | Het      | P                      |
| 2               | Male   | 121                    | 24.11                   | >100               | NA           | NA           | NA          | NA          | Normal             | <i>DUOX2</i>     | c.1428C>A         | p.Asn476Lys         | Het      | VUS                    |
|                 |        |                        |                         |                    |              |              |             |             |                    | <i>TG</i>        | c.5854C>T         | p.Arg1952Trp        | Het      | VUS                    |
| 3               | Female | 19                     | 17.41                   | 72.64              | 10.98        | 5.96         | 86.42       | 3.12        | Goiter             | <i>DUOX2</i>     | c.1268C>T         | p.Thr423Ile         | Het      | VUS                    |
|                 |        |                        |                         |                    |              |              |             |             |                    | <i>GLIS3</i>     | c.1982del         | p.Lys661SerfsTer145 | Het      | LP                     |
| 4               | Male   | 16                     | 12.61                   | >100               | 6.18         | 3.87         | 46.53       | 2           | Normal             | <i>DUOX A2</i>   | c.738C>G          | p.Tyr246Ter         | Het      | P                      |
| 5 <sup>c</sup>  | Female | 16                     | 43.11                   | >100               | 4.03         | 3.33         | 29.2        | 1.74        | Normal             | <i>SLC5A 5</i>   | c.1499C>T         | p.Pro500Leu         | Het      | VUS                    |
| 6               | Male   | 7                      | 71.11                   | >100               | 3.27         | 3.03         | 27.05       | 1.64        | Goiter             | <i>DUOX2</i>     | c.1588A>T         | p.Lys530Ter         | Het      | LP                     |
|                 |        |                        |                         |                    |              |              |             |             |                    | <i>DUOX2</i>     | c.4537G>C         | p.Gly1513Arg        | Het      | VUS                    |
| 7               | Male   | 85                     | 10.31                   | 10.09              | 16.15        | 4.87         | 63.95       | 1.28        | Normal             | <i>TG</i>        | c.3641G>A         | p.Arg1214Gln        | Het      | VUS                    |
| 8 <sup>a</sup>  | Male   | 42                     | 11.41                   | 23.76              | 11.46        | 7.11         | 78.32       | 3.05        | Normal             | <i>DUOX2</i>     | c.1588A>T         | p.Lys530Ter         | Het      | LP                     |
|                 |        |                        |                         |                    |              |              |             |             |                    | <i>TSHR</i>      | c.2272G>A         | p.Glu758Lys         | Het      | VUS                    |
| 9               | Male   | 12                     | 14.51                   | 67.59              | 11.53        | 4.43         | 71.31       | 1.79        | Normal             | <i>TSHR</i>      | c.740T>C          | p.Val247Ala         | Het      | VUS                    |
| 10 <sup>a</sup> | Female | 7                      | 121.81                  | >100               | 5.59         | 6.21         | 41.6        | 2.96        | Goiter             | <i>TG</i>        | c.635A>G          | p.Asn212Ser         | Het      | VUS                    |
| 11              | Female | 17                     | 12.5                    | 99.49              | 5.58         | 3.79         | 30.02       | 1.3         | Normal             | <i>DUOX2</i>     | c.3632G>A         | p.Arg1211His        | Het      | VUS                    |
| 12 <sup>c</sup> | Male   | 63                     | 22.01                   | >100               | 3.58         | 2.1          | 24.65       | 1.07        | Normal             | <i>GLIS3</i>     | c.1982del         | p.Lys661SerfsTer145 | Het      | LP                     |
| 13              | Male   | 17                     | 17.31                   | 64.15              | 8.36         | 4.85         | 53.88       | 1.94        | Goiter             | <i>DUOX2</i>     | c.1588A>T         | p.Lys530Ter         | Het      | LP                     |
|                 |        |                        |                         |                    |              |              |             |             |                    | <i>DUOX2</i>     | c.2291G>A         | p.Arg764Gln         | Het      | VUS                    |
|                 |        |                        |                         |                    |              |              |             |             |                    | <i>DUOX2</i>     | c.3689C>T         | p.Ala1230Val        | Het      | VUS                    |
|                 |        |                        |                         |                    |              |              |             |             |                    | <i>SECISB P2</i> | c.1212+4C>T       | IVS8+4C>T           | Het      | VUS                    |
| 14              | Male   | 8                      | 24.6                    | >100               | 5.09         | 3.87         | 35.17       | 1.58        | Goiter             | <i>DUOX2</i>     | c.1300C>T         | p.Arg434Ter         | Het      | P                      |

|                 |        |     |        |       |       |      |       |      |        |                |                |                     |     |     |
|-----------------|--------|-----|--------|-------|-------|------|-------|------|--------|----------------|----------------|---------------------|-----|-----|
|                 |        |     |        |       |       |      |       |      |        | <i>DUOX2</i>   | c.1588A>T      | p.Lys530Ter         | Het | LP  |
|                 |        |     |        |       |       |      |       |      |        | <i>SLC26A4</i> | c.919-2A>G     | IVS7-2A>G           | Het | P   |
| 15              | Male   | 6   | 25.31  | >100  | 7.95  | 3.09 | 58.3  | 1.44 | Normal | <i>TPO</i>     | c.2017G>A      | p.Glu673Lys         | Het | VUS |
|                 |        |     |        |       |       |      |       |      |        | <i>TPO</i>     | c.2268dup      | p.Glu757Ter         | Het | P   |
| 16              | Male   | 11  | 12.37  | 49.57 | 7.65  | 4.15 | 53    | 1.67 | Normal | <i>DUOX2</i>   | c.1310G>C      | p.Gly437Ala         | Het | VUS |
|                 |        |     |        |       |       |      |       |      |        | <i>DUOX2</i>   | c.4561G>T      | p.Gly1521Ter        | Het | VUS |
| 17              | Male   | 9   | 48.61  | >100  | 2.49  | 2.3  | 22.67 | 1.11 | Normal | <i>DUOX2</i>   | c.3329G>A      | p.Arg1110Gln        | Het | P   |
| 18              | Female | 9   | 200.01 | >100  | 10.29 | 3.3  | 58.27 | 1.22 | Normal | <i>TSHR</i>    | c.394G>C       | p.Gly132Arg         | Hom | VUS |
| 19              | Male   | 23  | 14.01  | >100  | 3.75  | 4.5  | 27.55 | 1.79 | Goiter | <i>DUOX2</i>   | c.2101C>T      | p.Arg701Ter         | Het | P   |
|                 |        |     |        |       |       |      |       |      |        | <i>DUOX2</i>   | c.1946C>A      | p.Ala649Glu         | Het | VUS |
| 20              | Female | 17  | 19.9   | >100  | 5.71  | 4.78 | 44.7  | 2.33 | Normal | <i>DUOX2</i>   | c.1295G>A      | p.Arg432His         | Het | VUS |
| 21              | Male   | 19  | 13.71  | >100  | 3.85  | 2.74 | 28.81 | 1    | Normal | <i>DUOX2</i>   | c.3689C>T      | p.Ala1230Val        | Het | VUS |
|                 |        |     |        |       |       |      |       |      |        | <i>KAT6B</i>   | c.1025T>C      | p.Ile342Thr         | Het | VUS |
| 22              | Male   | 19  | 35.21  | >100  | 6.31  | 5.16 | 43.65 | 2.19 | Goiter | <i>DUOX2</i>   | c.2048G>T      | p.Arg683Leu         | Het | VUS |
|                 |        |     |        |       |       |      |       |      |        | <i>DUOX2</i>   | c.3251G>A      | p.Arg1084Gln        | Het | VUS |
| 23              | Female | 355 | 17.81  | 35.43 | 9.99  | 5.6  | 63.22 | 2.4  | Normal | <i>DUOX2</i>   | c.2635G>A      | p.Glu879Lys         | Het | LP  |
| 24              | Male   | 15  | 20.21  | >100  | 3.28  | 5.56 | 23.24 | 2.34 | Normal | <i>DUOX2</i>   | c.1588A>T      | p.Lys530Ter         | Het | LP  |
| 25              | Female | 29  | 16.71  | 58.4  | 11.04 | 5.31 | 74.86 | 2.07 | Normal | <i>DUOX2</i>   | c.2635G>A      | p.Glu879Lys         | Het | LP  |
| 26              | Female | 10  | 66.91  | >100  | 4.15  | 3.56 | 33.23 | 1.76 | Goiter | <i>DUOX2</i>   | c.2048G>T      | p.Arg683Leu         | Het | VUS |
| 27              | Female | 6   | 81.21  | >100  | 4.38  | 3.7  | 37.28 | 1.76 | Goiter | <i>DUOX2</i>   | c.2048G>T      | p.Arg683Leu         | Het | VUS |
|                 |        |     |        |       |       |      |       |      |        | <i>DUOX2</i>   | c.2104_2106del | p.Gly702del         | Het | VUS |
| 28              | Male   | 23  | 19.9   | 28.4  | 11.69 | 6.57 | 74.92 | 2.5  | Normal | <i>DUOX2</i>   | c.4348T>C      | p.Tyr1450His        | Het | VUS |
| 29 <sup>a</sup> | Male   | 19  | 26.11  | 98.72 | 2.18  | 5.14 | NA    | NA   | Normal | <i>DUOX2</i>   | c.3595C>G      | p.Leu1199Val        | Het | VUS |
| 30 <sup>c</sup> | Male   | 35  | 48.61  | >100  | 7.28  | 3.51 | 49.25 | 1.46 | Normal | <i>DUOX2</i>   | c.505C>T       | p.Arg169Trp         | Het | VUS |
| 31              | Female | 19  | 15.71  | 48.21 | NA    | NA   | NA    | NA   | NA     | <i>DUOX2</i>   | c.1588A>T      | p.Lys530Ter         | Hom | LP  |
|                 |        |     |        |       |       |      |       |      |        | <i>TG</i>      | c.1597G>A      | p.Gly533Arg         | Het | VUS |
| 32              | Female | 33  | 12.11  | 12.43 | 11.15 | 5.99 | 80.4  | 2.43 | Normal | <i>DUOX2</i>   | c.2048G>T      | p.Arg683Leu         | Het | VUS |
|                 |        |     |        |       |       |      |       |      |        | <i>TG</i>      | c.5512del      | p.Asp1838ThrfsTer14 | Het | LP  |
|                 |        |     |        |       |       |      |       |      |        | <i>TPO</i>     | c.2603C>T      | p.Thr868Met         | Het | VUS |

|                 |        |    |        |       |       |      |       |      |        |                |                |              |     |     |
|-----------------|--------|----|--------|-------|-------|------|-------|------|--------|----------------|----------------|--------------|-----|-----|
| 33              | Female | 15 | 17.21  | 70.4  | 8.05  | 4.62 | 42.94 | 1.77 | Goiter | <i>DUOX2</i>   | c.1588A>T      | p.Lys530Ter  | Het | LP  |
|                 |        |    |        |       |       |      |       |      |        | <i>DUOX2</i>   | c.2654G>A      | p.Arg885Gln  | Het | P   |
| 34              | Male   | 14 | 11.01  | 56.95 | 7.93  | 4.88 | 61.69 | 2.06 | Normal | <i>DUOX2</i>   | c.2335-25T>C   | IVS18-25T>C  | Het | VUS |
|                 |        |    |        |       |       |      |       |      |        | <i>IYD</i>     | c.688-7G>A     | IVS4-7G>A    | Het | VUS |
| 35              | Male   | 28 | 12.81  | 75.22 | 5.25  | 4.48 | 37.38 | 1.78 | Normal | <i>IYD</i>     | c.380C>T       | p.Pro127Leu  | Het | VUS |
| 36              | Female | 24 | 12.21  | >100  | 2.29  | 2.36 | 20.16 | 1.18 | Goiter | <i>TPO</i>     | c.2146G>T      | p.Glu716Ter  | Het | LP  |
| 37 <sup>c</sup> | Female | 76 | 18.11  | 59.26 | 7.54  | 2.31 | 55.44 | 0.88 | Normal | <i>KAT6B</i>   | c.1025T>C      | p.Ile342Thr  | Het | VUS |
| 38              | Male   | 25 | 11.31  | 68.45 | 8.65  | 6.08 | 71.07 | 3.03 | Normal | <i>TSHR</i>    | c.823G>A       | p.Ala275Thr  | Het | VUS |
| 39              | Female | 29 | 19.91  | >100  | 3.54  | 2.8  | 28.89 | 1.36 | Normal | <i>DUOX2</i>   | c.1304A>G      | p.Asp435Gly  | Het | VUS |
|                 |        |    |        |       |       |      |       |      |        | <i>DUOX2</i>   | c.3329G>A      | p.Arg1110Gln | Het | P   |
|                 |        |    |        |       |       |      |       |      |        | <i>GLIS3</i>   | c.1843G>A      | p.Ala615Thr  | Het | VUS |
| 40 <sup>c</sup> | Male   | 99 | 1.8    | 4.33  | 8.24  | 1.56 | 45.44 | 0.72 | NA     | <i>POUIF1</i>  | c.744-6C>A     | IVS5-6C>A    | Het | VUS |
|                 |        |    |        |       |       |      |       |      |        | <i>TG</i>      | c.958C>T       | p.Arg320Cys  | Het | VUS |
| 41              | Male   | 9  | 113.11 | >100  | 1.85  | 2.24 | 15.74 | 0.97 | Goiter | <i>DUOX2</i>   | c.2104_2106del | p.Gly702del  | Het | VUS |
| 42              | Female | 10 | 15.41  | 48.55 | 10.96 | 3.98 | 71.78 | 1.68 | Normal | <i>DUOX2</i>   | c.1708C>T      | p.Gln570Ter  | Het | LP  |
|                 |        |    |        |       |       |      |       |      |        | <i>DUOX2</i>   | c.3693+1G>T    | IVS28+1G>T   | Het | P   |
| 43              | Female | 9  | 15.81  | 81.62 | 5.71  | 4.83 | 43    | 2.18 | Normal | <i>DUOX2</i>   | c.2048G>T      | p.Arg683Leu  | Het | VUS |
|                 |        |    |        |       |       |      |       |      |        | <i>DUOX2</i>   | c.4408C>T      | p.Arg1470Trp | Het | VUS |
| 44              | Female | 8  | 30.21  | >100  | 6.91  | 5.5  | 46.75 | 2.27 | Goiter | <i>DUOX2</i>   | c.1588A>T      | p.Lys530Ter  | Het | LP  |
|                 |        |    |        |       |       |      |       |      |        | <i>DUOX2</i>   | c.2635G>A      | p.Glu879Lys  | Het | LP  |
|                 |        |    |        |       |       |      |       |      |        | <i>SLC26A4</i> | c.2086C>T      | p.Gln696Ter  | Het | P   |
| 45              | Male   | 15 | 28.211 | >100  | 6.62  | 4.46 | 48.5  | 1.93 | Goiter | <i>DUOX2</i>   | c.1588A>T      | p.Lys530Ter  | Het | LP  |
|                 |        |    |        |       |       |      |       |      |        | <i>DUOX2</i>   | c.3329G>A      | p.Arg1110Gln | Het | P   |
| 46              | Female | 11 | 41.41  | 87.17 | 9.49  | 6.21 | 75.66 | 2.59 | Goiter | <i>NKX2-5</i>  | c.773G>C       | p.Gly258Ala  | Het | VUS |
|                 |        |    |        |       |       |      |       |      |        | <i>DUOX2</i>   | c.1268C>T      | p.Thr423Ile  | Het | VUS |
|                 |        |    |        |       |       |      |       |      |        | <i>LHX4</i>    | c.970G>A       | p.Ala324Thr  | Het | VUS |
|                 |        |    |        |       |       |      |       |      |        | <i>TSHR</i>    | c.915T>A       | p.Ser305Arg  | Het | VUS |
| 47              | Female | 8  | 24.21  | >100  | 5.36  | 4.48 | 46.09 | 1.88 | Goiter | <i>DUOX2</i>   | c.1268C>T      | p.Thr423Ile  | Het | VUS |
|                 |        |    |        |       |       |      |       |      |        | <i>DUOX2</i>   | c.1588A>T      | p.Lys530Ter  | Het | LP  |

|                 |        |    |        |         |       |      |       |      |            |                |                           |                            |     |     |
|-----------------|--------|----|--------|---------|-------|------|-------|------|------------|----------------|---------------------------|----------------------------|-----|-----|
|                 |        |    |        |         |       |      |       |      |            | <i>LHX4</i>    | c.1127C>T                 | p.Thr376Ile                | Het | VUS |
| 48 <sup>a</sup> | Female | 21 | 30.01  | 126.64  | 6     | 5.65 | NA    | NA   | Normal     | <i>DUOX2</i>   | c.1855G>T                 | p.Val619Leu                | Het | VUS |
| 49              | Male   | 16 | 23.01  | 44.67   | 11.76 | 4.91 | 82    | 1.96 | Athyreosis | <i>GLIS3</i>   | c.2723C>T                 | p.Ala908Val                | Het | VUS |
| 50 <sup>a</sup> | Male   | 13 | 21.31  | >100    | 2.4   | 1.48 | 11.57 | 0.65 | Normal     | <i>DUOX2</i>   | c.2048G>T                 | p.Arg683Leu                | Het | VUS |
|                 |        |    |        |         |       |      |       |      |            | <i>DUOX2</i>   | c.364C>A                  | p.Pro122Thr                | Het | VUS |
| 51              | Female | 29 | 17.21  | >100    | 5.4   | 4.73 | NA    | NA   | Normal     | <i>DUOX2</i>   | c.1588A>T                 | p.Lys530Ter                | Het | LP  |
| 52              | Male   | 23 | 16.51  | >100    | 4.15  | 5.11 | NA    | NA   | Normal     | <i>DUOX2</i>   | c.596del                  | p.Ser199TrpfsTer122        | Het | LP  |
|                 |        |    |        |         |       |      |       |      |            | <i>DUOX2</i>   | c.903G>T                  | p.Trp301Cys                | Het | VUS |
| 53              | Male   | 16 | 13.91  | >100    | 4.97  | 3.54 | NA    | NA   | Normal     | <i>DUOX2</i>   | c.2412C>G                 | p.Cys804Trp                | Het | VUS |
| 54 <sup>a</sup> | Female | 19 | 12.21  | 37.13   | 6.12  | 3.7  | NA    | NA   | Normal     | <i>DUOX2</i>   | c.2048G>T                 | p.Arg683Leu                | Het | VUS |
|                 |        |    |        |         |       |      |       |      |            | <i>DUOX2</i>   | c.655_656delinsTC         | p.Leu219Ser                | Het | VUS |
|                 |        |    |        |         |       |      |       |      |            | <i>DUOX2</i>   | c.646_647insTTTC<br>CCCCG | p.Gln216delinsLeuSerProGlu | Het | VUS |
|                 |        |    |        |         |       |      |       |      |            | <i>DUOX2</i>   | c.647_658del              | p.Gln216_Leu219del         | Het | VUS |
| 55              | Female | 26 | 22.6   | >100    | 4.95  | 5.04 | NA    | NA   | Goiter     | <i>DUOX2</i>   | c.1588A>T                 | p.Lys530Ter                | Het | LP  |
|                 |        |    |        |         |       |      |       |      |            | <i>DUOX2</i>   | c.477del                  | p.Glu160ArgfsTer16         | Het | LP  |
|                 |        |    |        |         |       |      |       |      |            | <i>TPO</i>     | c.2536C>T                 | p.Arg846Trp                | Het | VUS |
| 56              | Female | 11 | 38.81  | >150    | 4.96  | 4.83 | NA    | NA   | Goiter     | <i>IGSF1</i>   | c.584G>C                  | p.Gly195Ala                | Het | VUS |
|                 |        |    |        |         |       |      |       |      |            | <i>SLC26A4</i> | c.269C>T                  | p.Ser90Leu                 | Het | P   |
|                 |        |    |        |         |       |      |       |      |            | <i>TG</i>      | c.3040G>A                 | p.Asp1014Asn               | Het | VUS |
| 57              | Female | 45 | 25.21  | >100    | 6.61  | 4    | 45.99 | 1.78 | Normal     | <i>DUOX2</i>   | c.1588A>T                 | p.Lys530Ter                | Het | LP  |
| 58              | Female | 14 | 27.01  | >100    | 4.9   | 4.16 | NA    | NA   | Normal     | <i>DUOX2</i>   | c.1588A>T                 | p.Lys530Ter                | Het | LP  |
|                 |        |    |        |         |       |      |       |      |            | <i>DUOX2</i>   | c.3693+1G>T               | IVS28+1G>T                 | Het | P   |
| 59              | Male   | 15 | 27.31  | 24.8    | 10.79 | 6.79 | 67.63 | 3.56 | Normal     | <i>DUOX2</i>   | c.1310G>C                 | p.Gly437Ala                | Het | VUS |
|                 |        |    |        |         |       |      |       |      |            | <i>DUOX2</i>   | c.2654G>A                 | p.Arg885Gln                | Het | P   |
| 60              | Male   | 24 | 19.41  | 55.95   | 11.33 | 4.69 | NA    | NA   | Normal     | <i>DUOX2</i>   | c.1588A>T                 | p.Lys530Ter                | Het | LP  |
|                 |        |    |        |         |       |      |       |      |            | <i>DUOX2</i>   | c.602dup                  | p.Gln202ThrfsTer99         | Het | P   |
| 61              | Male   | 12 | 137.61 | 267.005 | 0.71  | 4.4  | NA    | NA   | Goiter     | <i>DUOX2</i>   | c.3329G>A                 | p.Arg1110Gln               | Het | P   |
| 62 <sup>c</sup> | Female | 14 | 3.23   | 27.57   | 11.08 | 6.05 | 71.66 | 2.64 | Normal     | <i>DUOX</i>    | c.413dup                  | p.Tyr138Ter                | Het | LP  |

|                 |        |    |        |       |       |      |       |      |        |       |                |                     |     |     |
|-----------------|--------|----|--------|-------|-------|------|-------|------|--------|-------|----------------|---------------------|-----|-----|
|                 |        |    |        |       |       |      |       |      |        | A2    |                |                     |     |     |
|                 |        |    |        |       |       |      |       |      |        | TG    | c.7753C>T      | p.Arg2585Trp        | Het | VUS |
| 63 <sup>c</sup> | Male   | 35 | 16.61  | 53.79 | 9.29  | 5.29 | NA    | NA   | Normal | DUOX2 | c.1588A>T      | p.Lys530Ter         | Het | LP  |
|                 |        |    |        |       |       |      |       |      |        | DUOX2 | c.3632G>A      | p.Arg1211His        | Het | VUS |
| 64 <sup>a</sup> | Female | 17 | 24.41  | >100  | 6.1   | 4.18 | 48.45 | 2.23 | Normal | DUOX2 | c.2654G>A      | p.Arg885Gln         | Het | P   |
| 65              | Male   | 15 | 206.61 | >100  | 4.27  | 0.83 | NA    | NA   | Normal | DUOX2 | c.2921G>A      | p.Arg974His         | Het | VUS |
|                 |        |    |        |       |       |      |       |      |        | DUOX2 | c.3329G>A      | p.Arg1110Gln        | Het | P   |
| 66              | Female | 9  | 241.61 | >100  | 12.9  | 3.54 | NA    | NA   | Normal | DUOX2 | c.1588A>T      | p.Lys530Ter         | Het | LP  |
| 67 <sup>a</sup> | Male   | 13 | 17.61  | 66.42 | 10.43 | 4.68 | NA    | NA   | Normal | TSHR  | c.1492G>A      | p.Gly498Ser         | Het | VUS |
|                 |        |    |        |       |       |      |       |      |        | TSHR  | c.694G>C       | p.Asp232His         | Het | VUS |
| 68              | Male   | 15 | 21.81  | 59.21 | 10.29 | 5.66 | 75.15 | 2.87 | Normal | DUOX2 | c.1127G>A      | p.Arg376Gln         | Het | VUS |
|                 |        |    |        |       |       |      |       |      |        | DUOX2 | c.514-2A>G     | IVS5-2A>G           | Het | LP  |
| 69              | Female | 17 | 7.9    | 62.75 | 9.78  | 4.73 | 65.28 | 2.34 | NA     | DUOX2 | c.3374A>G      | p.Asp1125Gly        | Het | VUS |
|                 |        |    |        |       |       |      |       |      |        | DUOX2 | c.4375G>A      | p.Asp1459Asn        | Het | VUS |
|                 |        |    |        |       |       |      |       |      |        | DUOX2 | c.2048G>T      | p.Arg683Leu         | Het | VUS |
| 70              | Male   | 15 | 13.81  | >100  | 7.06  | 4.48 | NA    | NA   | Normal | DUOX2 | c.1588A>T      | p.Lys530Ter         | Het | LP  |
|                 |        |    |        |       |       |      |       |      |        | DUOX2 | c.1310G>C      | p.Gly437Ala         | Het | VUS |
| 71              | Male   | 28 | 19.31  | 95.2  | 5.24  | 4.08 | 22.56 | 1.81 | Goiter | DUOX2 | c.3329G>A      | p.Arg1110Gln        | Het | P   |
|                 |        |    |        |       |       |      |       |      |        | DUOX2 | c.2048G>T      | p.Arg683Leu         | Het | VUS |
| 72              | Male   | 28 | 12.31  | 51.25 | 10.22 | 4.62 | NA    | NA   | Normal | DUOX2 | c.3632G>A      | p.Arg1211His        | Het | VUS |
|                 |        |    |        |       |       |      |       |      |        | DUOX2 | c.2894C>T      | p.Ser965Leu         | Het | VUS |
|                 |        |    |        |       |       |      |       |      |        | TG    | c.8205del      | p.Gln2736SerfsTer10 | Het | VUS |
|                 |        |    |        |       |       |      |       |      |        | TSHR  | c.1960A>T      | p.Ile654Phe         | Het | P   |
| 73 <sup>a</sup> | Female | 20 | 170.51 | >100  | 3.48  | 2.59 | 26.89 | 0.99 | Normal | DUOX2 | c.3329G>A      | p.Arg1110Gln        | Het | P   |
|                 |        |    |        |       |       |      |       |      |        | DUOX2 | c.3285_3286del | p.Ile1097LeufsTer24 | Het | LP  |
| 74 <sup>a</sup> | Male   | 12 | 22.3   | >100  | 7.1   | 4.68 | 46.83 | 2.48 | Normal | DUOX2 | c.3693+1G>T    | IVS28+1G>T          | Het | P   |
|                 |        |    |        |       |       |      |       |      |        | DUOX2 | c.596del       | p.Ser199TrpfsTer122 | Het | LP  |
| 75              | Female | 10 | 238.41 | >100  | 1.14  | 1.2  | <5.4  | <0.3 | Normal | DUOX2 | c.3693+1G>T    | IVS28+1G>T          | Het | P   |
|                 |        |    |        |       |       |      |       |      |        | DUOX2 | c.1588A>T      | p.Lys530Ter         | Het | LP  |
| 76              | Male   | 9  | 10.91  | 25.69 | 10.81 | 5.15 | NA    | NA   | Normal | DUOX2 | c.1393C>A      | p.Pro465Thr         | Het | VUS |
|                 |        |    |        |       |       |      |       |      |        | TPO   | c.1367G>A      | p.Arg456Lys         | Het | VUS |

|    |      |    |       |      |      |      |      |      |        |                |             |             |     |     |
|----|------|----|-------|------|------|------|------|------|--------|----------------|-------------|-------------|-----|-----|
| 77 | Male | 16 | 14.4  | >100 | 6.67 | 5.99 | NA   | NA   | NA     | <i>DUOX2</i>   | c.2048G>T   | p.Arg683Leu | Het | VUS |
|    |      |    |       |      |      |      |      |      |        | <i>DUOX2</i>   | c.505C>T    | p.Arg169Trp | Het | VUS |
| 78 | Male | 21 | 94.51 | >100 | 8.83 | 2.93 | 72.1 | 1.32 | Goiter | <i>DUOX2</i>   | c.3693+1G>T | IVS28+1G>T  | Het | P   |
|    |      |    |       |      |      |      |      |      |        | <i>DUOX2</i>   | c.1588A>T   | p.Lys530Ter | Het | LP  |
|    |      |    |       |      |      |      |      |      |        | <i>TG</i>      | c.925A>G    | p.Thr309Ala | Het | VUS |
|    |      |    |       |      |      |      |      |      |        | <i>SLC26A4</i> | c.-3-46C>T  | IVS1-46C>T  | Het | VUS |
|    |      |    |       |      |      |      |      |      |        | <i>SLC26A4</i> | c.697G>C    | p.Val233Leu | Het | VUS |
|    |      |    |       |      |      |      |      |      |        | <i>TRHR</i>    | c.504T>G    | p.Ile168Met | Het | VUS |

<sup>a</sup>Patient with a family history of thyroid disease; <sup>b</sup>Age at diagnosis; and <sup>c</sup>Patient is premature. NA, data not available; Het, heterozygous; Hom, homozygous; P, pathogenic; LP, likely pathogenic; VUS, variants of uncertain significance; normal heel blood TSH: <10 µIU/ml; normal serum TSH: 0.27-4.2 µIU/ml; normal FT4: 12-22 pmol/l; normal FT3: 2.8-7.1 pmol/l; normal T4: 68-181 nmol/l; normal T3: 1.3-3.1 nmol/l.
